# Supplementary material for: Subpathway-GMir: identifying miRNA-mediated metabolic subpathways by integrating condition-specific genes, microRNAs, and pathway topologies
Source: PubMed Central journal article supplement (PMC4770763; doi:10.18632/oncotarget.5341), 2015-10-12
Supplement: oncotarget-06-39151-s001.pdf [file oncotarget-06-39151-s001.pdf]

SUPPLEMENTARY FIGURES AND TABLES

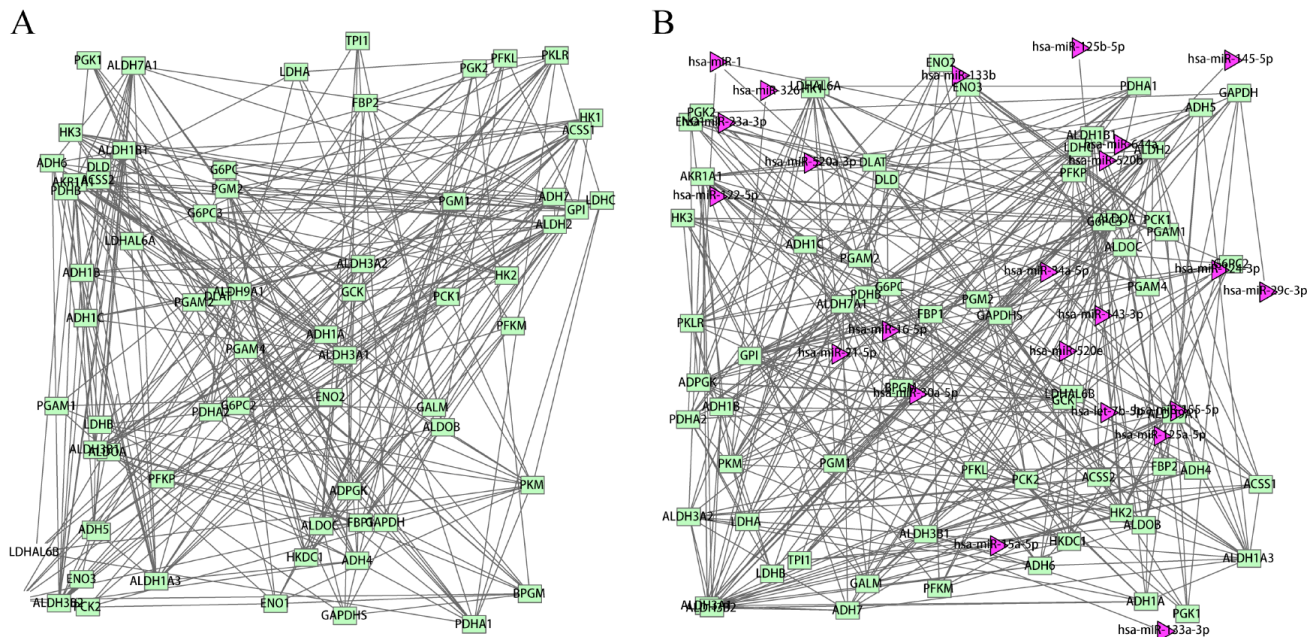

**Supplementary Figure S1: The “Glycolysis/Gluconeogenesis” metabolic pathway graph before and after reconstructing.** The rectangle and triangle nodes represent genes and miRNAs, respectively. **A.** The graph before reconstructing. **B.** The graph after reconstructing.

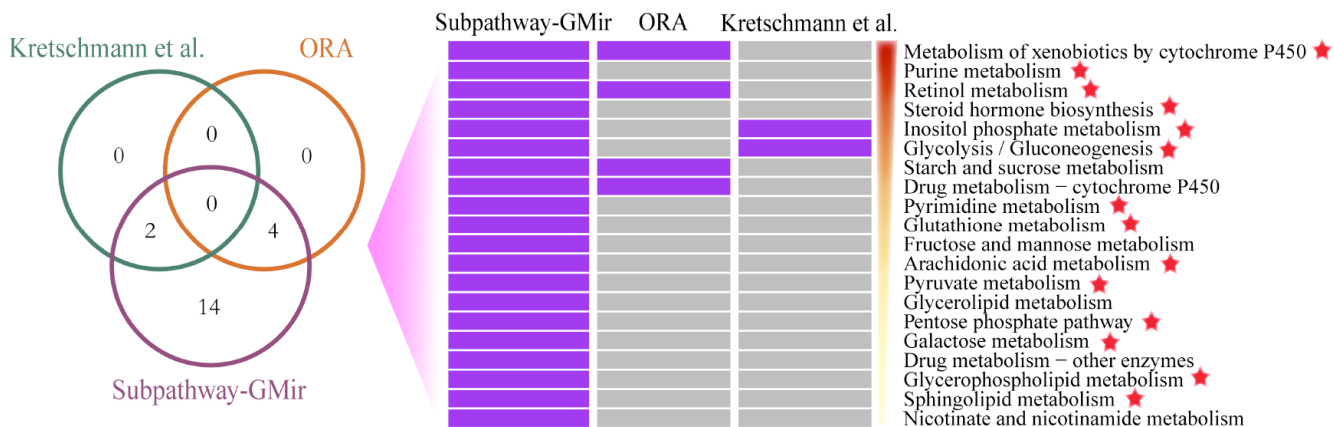

**Supplementary Figure S2: Comparison of pathways identified by Subpathway-GMir, ORA and the Kretschmann et al. method in STAD data set (FDR < 0.01).** Venn diagram depicting the overlap of pathways. These pathways were sorted by statistical significance (using Subpathway-GMir) in descending order. Each row represents a pathway and each column represents a method. The purple and grey grid represents that the pathway was or wasn't identified by the method, respectively. Pathways supported by scientific studies are marked with red stars.

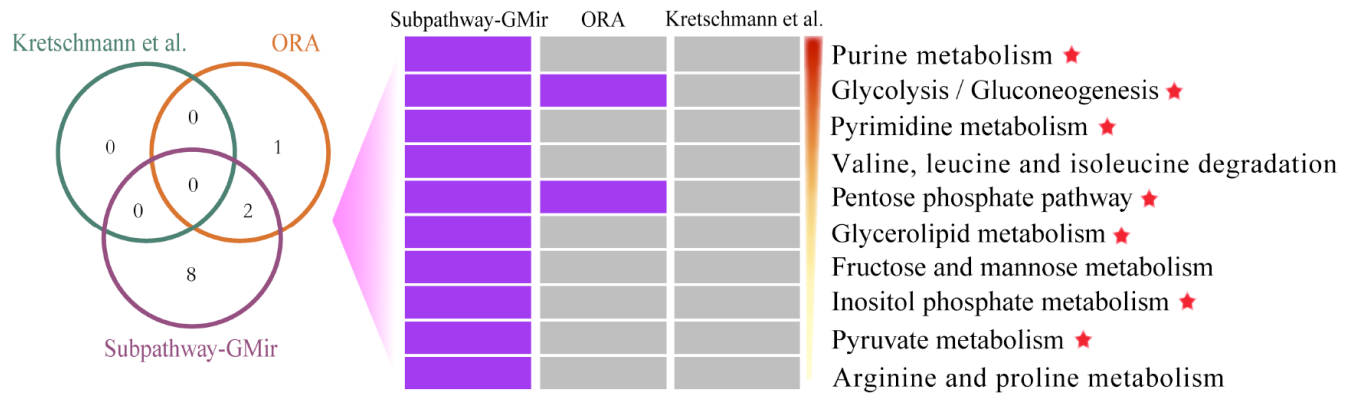

**Supplementary Figure S3: Comparison of pathways identified by Subpathway-GMir, ORA and the Kretschmann et al. method in T2D data set (FDR < 0.01).** Venn diagram depicting the overlap of pathways. These pathways were sorted by statistical significance (using Subpathway-GMir) in descending order. Each row represents a pathway and each column represents a method. The purple and grey grid represents that the pathway was or wasn't identified by the method, respectively. Pathways supported by scientific studies are marked with red stars.

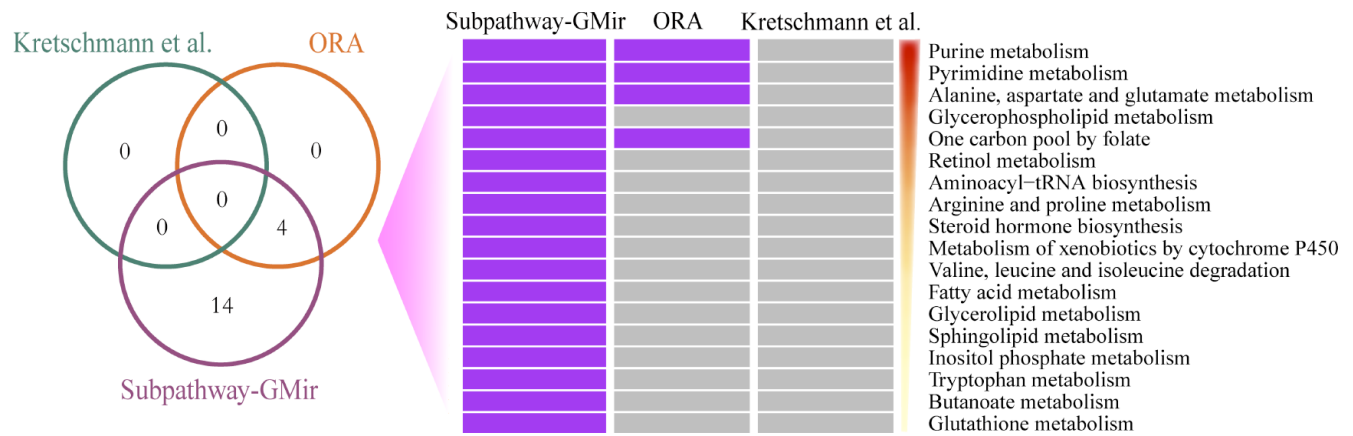

**Supplementary Figure S4: Comparison of pathways identified by Subpathway-GMir, ORA and the Kretschmann et al. method in LIHC data set 2 (FDR < 0.01).** Venn diagram depicting the overlap of pathways. These pathways were sorted by statistical significance (using Subpathway-GMir) in descending order. Each row represents a pathway and each column represents a method. The purple and grey grid represents that the pathway was or wasn't identified by the method, respectively.

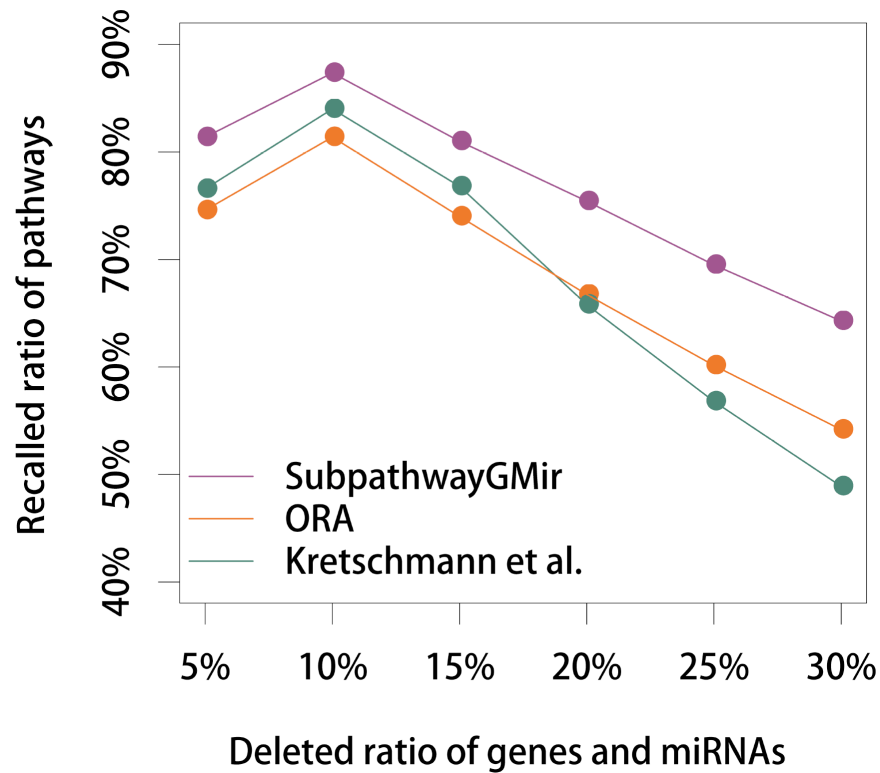

Supplementary Figure S5: The mean ratio of recalled pathways using Subpathway-GMir, ORA and the Kretschmann *et al.* method (*FDR* < 0.05).

Supplementary Table S1: Subpathways identified using subpathway-GMir in LIHC data set 1

| Pathway Id   | Pathway Name                                 | FDR       | Possible relations to cancers                                                                                      | Cancer-related miRNAs                                                                                                                                                              | Reference |
|--------------|----------------------------------------------|-----------|--------------------------------------------------------------------------------------------------------------------|------------------------------------------------------------------------------------------------------------------------------------------------------------------------------------|-----------|
| path:00010_1 | Glycolysis / Gluconeogenesis                 | <1.00E-16 | MiR-520a/b/e regulate glycolysis in HCC                                                                            | miR-34a-5p;miR-21-5p; miR-133a-3p;miR-326; miR-29c-3p;miR-520b; miR-520e;miR-125b-5p                                                                                               | [1]       |
| path:00230_1 | Purine metabolism                            | <1.00E-16 | Transformation and progression in hepatomas                                                                        | miR-34a-5p;miR-24-3p; let-7c-5p;miR-182-5p; miR-133a-3p;miR-326                                                                                                                    | [2]       |
| path:00240_1 | Pyrimidine metabolism                        | <1.00E-16 | Transformation and progression in hepatomas                                                                        | miR-34a-5p;miR-24-3p; let-7c-5p;miR-133a-3p                                                                                                                                        | [2]       |
| path:00562_1 | Inositol phosphate metabolism                | <1.00E-16 | MiR-21 mediate the increase of cell proliferation and invasion in HCC<br>MiR-221&222 enhance tumorigenicity in HCC | miR-217;miR-216a-5p; miR-214-3p;miR-21-5p; miR-519a-3p;miR-519d-3p; miR-19a-3p;miR-141-3p; miR-18a-5p;miR-221-3p; miR-222-3p;miR-93-5p; miR-519c-3p;miR-34a-5p; miR-205-5p;miR-184 | [3, 4]    |
| path:00564_1 | Glycerophospholipid metabolism               | <1.00E-16 | Drug target against cancer                                                                                         | miR-338-3p;miR-34a-5p                                                                                                                                                              | [5]       |
| path:00980_1 | Metabolism of xenobiotics by cytochrome P450 | 3.86E-14  | Poor prognosis of HCC                                                                                              | miR-513a-3p;miR-133a-3p                                                                                                                                                            | [6]       |

(Continued)

| Pathway Id   | Pathway Name                                | FDR      | Possible relations to cancers                                                                 | Cancer-related miRNAs                        | Reference |
|--------------|---------------------------------------------|----------|-----------------------------------------------------------------------------------------------|----------------------------------------------|-----------|
| path:00310_1 | Lysine degradation                          | 1.18E-12 | —                                                                                             | miR-34a-5p;miR-21-5p                         | —         |
| path:00590_1 | Arachidonic acid metabolism                 | 4.07E-12 | MiRNA-101 promotes apoptosis and suppress in HCC<br>Cox-2 promotes the growth of HCC cell     | miR-137;miR-101-3p;<br>miR-338-3p            | [7, 8]    |
| path:00071_1 | Fatty acid metabolism                       | 1.63E-11 | Significantly altered fatty acid-related metabolic pathways in HCC                            | miR-34a-5p                                   | [9]       |
| path:00561_1 | Glycerolipid metabolism                     | 1.52E-10 | MiR-125b could inhibit cell proliferation, cell cycle progression and metastasis of HCC cells | miR-125b-5p;miR-34a-5p                       | [10]      |
| path:00830_1 | Retinol metabolism                          | 2.72E-10 | The high prediagnostic serum level of retinol is associated with a decreased risk of HCC      | miR-34a-5p;miR-125b-5p                       | [11, 12]  |
| path:00051_1 | Fructose and mannose metabolism             | 8.50E-10 | —                                                                                             | miR-34a-5p;miR-125b-5p;<br>miR-520b;miR-520e | —         |
| path:00982_1 | Drug metabolism - cytochrome P450           | 8.88E-10 | —                                                                                             | miR-513a-3p;miR-133a-3p                      | —         |
| path:00600_1 | Sphingolipid metabolism                     | 4.79E-09 | Chemoprevention target of HCC; Tumor growth of hepatocellular carcinoma                       | miR-221-3p;miR-222-3p;<br>miR-125b-5p        | [13–15]   |
| path:00030_1 | Pentose phosphate pathway                   | 6.28E-09 | PPP activity is elevated in rapidly proliferating tumor cells                                 | miR-34a-5p;miR-520b;<br>miR-520e             | [16, 17]  |
| path:00140_1 | Steroid hormone biosynthesis                | 8.86E-09 | Carcinogenesis in HCC                                                                         | miR-199a-5p                                  | [18, 19]  |
| path00380_1  | Tryptophan metabolism                       | 2.54E-08 | —                                                                                             | miR-34a-5p                                   | —         |
| path:00500_1 | Starch and sucrose metabolism               | 2.54E-08 | —                                                                                             | miR-125b-5p;miR-34a-5p                       | —         |
| path:00330_2 | Arginine and proline metabolism             | 2.54E-08 | —                                                                                             | miR-34a-5p;miR-24-3p                         | —         |
| path:00565_1 | Ether lipid metabolism                      | 2.54E-08 | —                                                                                             | miR-338-3p                                   | —         |
| path:00250_1 | Alanine, aspartate and glutamate metabolism | 3.63E-08 | —                                                                                             | miR-34a-5p                                   | —         |
| path:00620_1 | Pyruvate metabolism                         | 1.24E-07 | Metabolism and tumour growth                                                                  | miR-21-5p;miR-133a-3p;<br>miR-326;miR-34a-5p | [20, 21]  |
| path:00410_1 | beta-Alanine metabolism                     | 1.64E-07 | —                                                                                             | miR-34a-5p;miR-24-3p                         | —         |

(Continued)

| Pathway Id   | Pathway Name                               | FDR      | Possible relations to cancers    | Cancer-related miRNAs              | Reference |
|--------------|--------------------------------------------|----------|----------------------------------|------------------------------------|-----------|
| path:00350_1 | Tyrosine metabolism                        | 1.14E-06 | Pathogenesis of HCC              | —                                  | [22]      |
| path:00280_2 | Valine, leucine and isoleucine degradation | 1.58E-06 | —                                | miR-34a-5p                         | —         |
| path:00480_1 | Glutathione metabolism                     | 3.83E-06 | The growth of liver cancer cells | miR-183-5p;miR-513a-3p;miR-133a-3p | [23]      |
| path:00260_1 | Glycine, serine and threonine metabolism   | 2.03E-05 | —                                | —                                  | —         |
| path:00052_1 | Galactose metabolism                       | 2.03E-05 | The treatment of HCC             | miR-34a-5p;miR-125b-5p             | [24, 25]  |
| path:00340_2 | Histidine metabolism                       | 2.03E-05 | Carcinogenesis                   | miR-24-3p;miR-34a-5p               | [26]      |

Supplementary Table S2: Subpathways identified using subpathway-GMir in STAD data set

| Pathway Id   | Pathway Name                                 | FDR      | Possible relations to cancer | Cancer-related miRNAs                                                                                                                              | Reference |
|--------------|----------------------------------------------|----------|------------------------------|----------------------------------------------------------------------------------------------------------------------------------------------------|-----------|
| path:00980_1 | Metabolism of xenobiotics by cytochrome P450 | 2.22E-15 | Development of STAD          | miR-122-5p;miR-133a-3p;miR-1;miR-145-5p                                                                                                            | [27, 28]  |
| path:00230_1 | Purine metabolism                            | 1.89E-14 | Development of STAD          | miR-1;miR-182-5p;miR-122-5p;miR-133a-3p;miR-133b                                                                                                   | [29]      |
| path:00830_1 | Retinol metabolism                           | 3.12E-13 | Prognosis of STAD            | —                                                                                                                                                  | [30]      |
| path:00140_1 | Steroid hormone biosynthesis                 | 9.63E-13 | Apoptosis and Prognosis      | miR-1;miR-19b-3p;miR-122-5p                                                                                                                        | [31, 32]  |
| path:00562_2 | Inositol phosphate metabolism                | 9.86E-12 | Cancer aggressiveness        | miR-217;miR-17-5p;miR-216a-5p;miR-21-5p;miR-519a-3p;miR-19a-3p;miR-19b-3p;miR-18a-5p;miR-20a-5p;miR-222-3p;miR-106b-5p;miR-93-5p;miR-519c-3p;miR-1 | [33]      |
| path:00010_1 | Glycolysis / Gluconeogenesis                 | 1.46E-11 | Prognosis                    | miR-122-5p;miR-1;miR-145-5p;miR-29c-3p;miR-15a-5p;miR-520b;miR-520e                                                                                | [34]      |
| path:00500_1 | Starch and sucrose metabolism                | 4.02E-11 | —                            | miR-122-5p;miR-1                                                                                                                                   | —         |
| path:00982_1 | Drug metabolism - cytochrome P450            | 1.49E-09 | —                            | miR-145-5p;miR-122-5p;miR-133a-3p;miR-1                                                                                                            | —         |
| path:00240_1 | Pyrimidine metabolism                        | 1.88E-09 | Differentiation of STAD      | miR-1;miR-122-5p;miR-17-3p;miR-133a-3p                                                                                                             | [35]      |
| path:00480_1 | Glutathione metabolism                       | 1.86E-08 | Development of STAD          | miR-1;miR-17-3p;miR-122-5p;miR-133a-3p                                                                                                             | [36, 37]  |

(Continued)

| Pathway Id   | Pathway Name                           | FDR      | Possible relations to cancer                          | Cancer-related miRNAs                              | Reference |
|--------------|----------------------------------------|----------|-------------------------------------------------------|----------------------------------------------------|-----------|
| path:00051_1 | Fructose and mannose metabolism        | 3.64E-08 | —                                                     | miR-145-5p;miR-122-5p;miR-520b;miR-520e;miR-15a-5p | —         |
| path:00590_1 | Arachidonic acid metabolism            | 4.27E-08 | Apoptosis of gastric cancer                           | miR-1;miR-17-3p                                    | [38, 39]  |
| path:00620_1 | Pyruvate metabolism                    | 6.46E-08 | Growth of gastric cancer                              | miR-21-5p;miR-133b;miR-133a-3p;miR-145-5p;miR-1    | [40, 41]  |
| path:00561_1 | Glycerolipid metabolism                | 7.24E-08 | —                                                     | miR-1;miR-145-5p                                   | —         |
| path:00030_1 | Pentose phosphate pathway              | 1.49E-07 | Apoptosis of gastric cancer                           | miR-1;miR-122-5p;miR-520b;miR-520e                 | [42]      |
| path:00052_1 | Galactose metabolism                   | 3.02E-07 | Metastases                                            | miR-145-5p;miR-1;miR-122-5p                        | [43]      |
| path:00983_4 | Drug metabolism - other enzymes        | 5.07E-07 | —                                                     | —                                                  | —         |
| path:00564_1 | Glycerophospholipid metabolism         | 7.71E-06 | The treatment of cancer                               | miR-1;miR-210-3p                                   | [5]       |
| path:00600_1 | Sphingolipid metabolism                | 4.08E-05 | Apoptosis, Progression and survival of gastric cancer | miR-1;miR-222-3p                                   | [44, 45]  |
| path:00760_1 | Nicotinate and nicotinamide metabolism | 4.76E-04 | —                                                     | miR-1;miR-122-5p;miR-133a-3p                       | —         |

Supplementary Table S3: Subpathways identified using subpathway-GMir in T2D data set

| Pathway Id   | Pathway Name                               | FDR       | Possible relations to T2D                                                                        | T2D-related miRNAs            | Reference |
|--------------|--------------------------------------------|-----------|--------------------------------------------------------------------------------------------------|-------------------------------|-----------|
| path:00230_1 | Purine metabolism                          | <1.00E-16 | Progression and treatment                                                                        | miR-320a;miR-133b             | [46, 47]  |
| path:00010_1 | Glycolysis / Gluconeogenesis               | 1.04E-12  | Gluconeogenesis is enhanced in T2D<br>The sustained gluconeogenesis produced the hallmark of T2D | miR-133b;miR-143-3p           | [48, 49]  |
| path:00240_1 | Pyrimidine metabolism                      | 2.12E-09  | Progression and treatment                                                                        | —                             | [50]      |
| path:00280_1 | Valine, leucine and isoleucine degradation | 1.39E-08  | —                                                                                                | —                             | —         |
| path:00030_1 | Pentose phosphate pathway                  | 1.39E-08  | Progression and treatment                                                                        | —                             | [51]      |
| path:00561_1 | Glycerolipid metabolism                    | 2.25E-08  | Treatment of T2D                                                                                 | —                             | [52, 53]  |
| path:00051_1 | Fructose and mannose metabolism            | 9.07E-08  | —                                                                                                | miR-143-3p                    | —         |
| path:00562_1 | Inositol phosphate metabolism              | 2.16E-07  | Downregulated in T2D                                                                             | miR-17-5p;miR-107;hsa-miR-184 | [54]      |
| path:00620_1 | Pyruvate metabolism                        | 6.75E-07  | Development of T2D                                                                               | miR-133b                      | [55, 56]  |
| path:00330_1 | Arginine and proline metabolism            | 3.21E-06  | —                                                                                                | —                             | —         |



**Supplementary Table S4: Subpathways identified using subpathway-GMir in LIHC data set 2**

| Pathway Id   | Pathway Name                                 | FDR       |
|--------------|----------------------------------------------|-----------|
| path:00230_1 | Purine metabolism                            | <1.00E-16 |
| path:00240_1 | Pyrimidine metabolism                        | <1.00E-16 |
| path:00250_1 | Alanine, aspartate and glutamate metabolism  | 1.56E-11  |
| path:00564_1 | Glycerophospholipid metabolism               | 1.11E-08  |
| path:00670_1 | One carbon pool by folate                    | 1.11E-08  |
| path:00830_1 | Retinol metabolism                           | 1.11E-08  |
| path:00970_1 | Aminoacyl-tRNA biosynthesis                  | 3.56E-08  |
| path:00330_1 | Arginine and proline metabolism              | 4.22E-08  |
| path:00140_1 | Steroid hormone biosynthesis                 | 7.29E-08  |
| path:00980_1 | Metabolism of xenobiotics by cytochrome P450 | 7.29E-08  |
| path:00280_1 | Valine, leucine and isoleucine degradation   | 1.13E-07  |
| path:00071_1 | Fatty acid metabolism                        | 1.52E-07  |
| path:00561_1 | Glycerolipid metabolism                      | 1.52E-07  |
| path:00600_1 | Sphingolipid metabolism                      | 1.78E-07  |
| path:00562_1 | Inositol phosphate metabolism                | 4.66E-07  |
| path:00380_1 | Tryptophan metabolism                        | 1.42E-06  |
| path:00650_1 | Butanoate metabolism                         | 1.42E-06  |
| path:00480_1 | Glutathione metabolism                       | 3.46E-06  |

**Supplementary Table S5: The T2D-related risk miRNAs**

| miRNA           | PMID     |
|-----------------|----------|
| hsa-miR-196a2   | 25557604 |
| hsa-miR-107     | 25522185 |
| hsa-miR-17-5p   | 25409512 |
| hsa-miR-221     | 25409512 |
| hsa-miR-124a    | 25408296 |
| hsa-miR-375     | 25408296 |
| hsa-let-7       | 25399420 |
| hsa-miR-18a     | 25371752 |
| hsa-miR-199a-3p | 25180600 |
| hsa-miR-342     | 25180600 |
| hsa-miR-195     | 25138607 |
| hsa-miR-29a     | 25138607 |
| hsa-miR-103     | 25010252 |
| hsa-miR-143     | 25010252 |
| hsa-miR-483-3p  | 25010252 |
| hsa-miR-23a     | 24981880 |

(Continued)

| miRNA          | PMID     |
|----------------|----------|
| hsa-miR-196a2  | 24972764 |
| hsa-miR-143-3p | 24970281 |
| hsa-miR-126    | 24927146 |
| hsa-miR-191    | 24795757 |
| hsa-miR-378    | 24771406 |
| hsa-miR-149    | 24757201 |
| hsa-miR-130a   | 24750349 |
| hsa-miR-375    | 24741571 |
| hsa-miR-146a   | 24682535 |
| hsa-miR-128a   | 24682535 |
| hsa-miR-27a    | 24682535 |
| hsa-miR-15a    | 24497980 |
| hsa-miR-20     | 24497980 |
| hsa-miR-21     | 24497980 |
| hsa-miR-24     | 24497980 |
| hsa-miR-29b    | 24497980 |
| hsa-miR-126    | 24497980 |
| hsa-miR-144    | 24497980 |
| hsa-miR-150    | 24497980 |
| hsa-miR-197    | 24497980 |
| hsa-miR-223    | 24497980 |
| hsa-miR-191    | 24497980 |
| hsa-miR-320a   | 24497980 |
| hsa-miR-486-5p | 24497980 |
| hsa-miR-28-3p  | 24497980 |
| hsa-miR-140-5p | 24478399 |
| hsa-miR-142-3p | 24478399 |
| hsa-miR-222    | 24478399 |
| hsa-miR-423-5p | 24478399 |
| hsa-miR-125b   | 24478399 |
| hsa-miR-192    | 24478399 |
| hsa-miR-195    | 24478399 |
| hsa-miR-130b   | 24478399 |
| hsa-miR-532-5p | 24478399 |
| hsa-miR-126    | 24478399 |
| hsa-miR-126    | 24455723 |
| hsa-miR-92a    | 24379347 |
| hsa-miR-193b   | 24379347 |

(Continued)



| miRNA          | PMID     |
|----------------|----------|
| hsa-miR-126    | 24379347 |
| hsa-miR-375    | 24366165 |
| hsa-miR-377-5p | 24352417 |
| hsa-miR-628-3p | 24352417 |
| hsa-miR-3137   | 24352417 |
| hsa-miR-143    | 24333576 |
| hsa-miR-145    | 24333576 |
| hsa-miR-138    | 24204780 |
| hsa-miR-15b    | 24204780 |
| hsa-miR-376a   | 24204780 |
| hsa-miR-503    | 24204780 |
| hsa-miR-187    | 24149837 |
| hsa-miR-184    | 24109547 |
| hsa-let-7a     | 24105413 |
| hsa-let-7d     | 24105413 |
| hsa-miR-146a   | 24023848 |
| hsa-miR-106b   | 23954742 |
| hsa-miR-34a    | 23828613 |
| hsa-miR-96     | 23828613 |
| hsa-miR-143    | 23812417 |
| hsa-miR-21     | 23771797 |
| hsa-miR-155    | 23616185 |
| hsa-miR-150    | 23391324 |
| hsa-miR-342    | 23391324 |
| hsa-miR-126    | 23386708 |
| hsa-miR-375    | 23372846 |
| hsa-miR-223    | 23305783 |
| hsa-miR-30c    | 21878751 |
| hsa-miR-146a   | 21249428 |
| hsa-miR-34a    | 20857148 |
| hsa-miR-181d   | 20639500 |
| hsa-miR-375    | 20467341 |
| hsa-miR-375    | 20224724 |
| hsa-miR375     | 20221699 |
| hsa-miR-223    | 20080987 |
| hsa-miR-375    | 25120598 |
| hsa-miR-143-3p | 24970281 |
| hsa-miR-326    | 24937531 |

(Continued)

| miRNA          | PMID     |
|----------------|----------|
| hsa-miR-let-7a | 24937531 |
| hsa-miR-let-7f | 24937531 |
| hsa-miR-92a    | 24379347 |
| hsa-miR-181a   | 22476949 |
| hsa-miR-483-3p | 22223106 |
| hsa-miR-27a    | 23032062 |
| hsa-miR-320a   | 23032062 |
| hsa-miR-192    | 21829658 |
| hsa-miR-29a    | 21829658 |
| hsa-miR-30d    | 21829658 |
| hsa-miR-320a   | 21829658 |
| hsa-miR-20b    | 20651284 |
| hsa-miR-21     | 20651284 |
| hsa-miR-24     | 20651284 |
| hsa-miR-15a    | 20651284 |
| hsa-miR-126    | 20651284 |
| hsa-miR-191    | 20651284 |
| hsa-miR-197    | 20651284 |
| hsa-miR-223    | 20651284 |
| hsa-miR-320    | 20651284 |
| hsa-miR-486    | 20651284 |
| hsa-miR-28-3p  | 20651284 |
| hsa-miR-133a   | 20353613 |
| hsa-miR-133b   | 20353613 |
| hsa-miR-206    | 20353613 |
| hsa-miR-107    | 25522185 |
| hsa-miR-195    | 25138607 |
| hsa-miR-7      | 24944010 |
| hsa-miR-124a   | 24944010 |
| hsa-miR-9      | 24944010 |
| hsa-miR-96     | 24944010 |
| hsa-miR-15a    | 24944010 |
| hsa-miR-15b    | 24944010 |
| hsa-miR-34a    | 24944010 |
| hsa-miR-195a   | 24944010 |
| hsa-miR-376    | 24944010 |
| hsa-miR-107    | 24944010 |
| hsa-miR-146    | 24944010 |

(Continued)

| miRNA          | PMID     |
|----------------|----------|
| hsa-miR-320    | 24944010 |
| hsa-miR-383    | 24944010 |
| hsa-miR-181b   | 24944010 |
| hsa-miR-128a   | 24944010 |
| hsa-miR-29     | 24944010 |
| hsa-miR-384-5p | 24944010 |
| hsa-miR-126    | 24944010 |
| hsa-miR-143    | 24944010 |
| hsa-miR-145    | 24944010 |
| hsa-miR-33a    | 24944010 |
| hsa-miR-33b    | 24944010 |
| hsa-miR-21     | 24944010 |
| hsa-miR-133a   | 24944010 |
| hsa-miR-133b   | 24944010 |
| hsa-miR-223    | 24944010 |
| hsa-miR-103    | 24944010 |
| hsa-miR-29a    | 24944010 |
| hsa-miR-27b    | 24944010 |
| hsa-miR-15b    | 25403480 |
| hsa-miR-16     | 25403480 |
| hsa-miR-17     | 25403480 |
| hsa-miR-451    | 25403480 |
| hsa-miR-106b   | 25403480 |
| hsa-miR-103    | 25403480 |
| hsa-miR-425    | 25403480 |
| hsa-miR-106a   | 25403480 |
| hsa-miR-10b    | 25403480 |
| hsa-miR-25     | 25403480 |
| hsa-miR-93     | 25403480 |
| hsa-miR-363    | 25403480 |
| hsa-miR-107    | 25403480 |
| hsa-miR-191    | 25403480 |
| hsa-miR-30e*   | 25403480 |
| hsa-let-7i     | 25403480 |
| hsa-miR-20a    | 25403480 |
| hsa-miR-223    | 25403480 |
| hsa-miR-92a    | 25403480 |
| hsa-miR-20b    | 25403480 |

(Continued)

| miRNA          | PMID     |
|----------------|----------|
| hsa-miR-18a    | 25677225 |
| hsa-miR-221    | 25677225 |
| hsa-miR-144    | 25677225 |
| hsa-miR-320a   | 25677225 |
| hsa-miR-375    | 25677225 |
| hsa-miR-589    | 25677225 |
| hsa-miR-665    | 25677225 |
| hsa-miR-376a   | 25677225 |
| hsa-miR-140-5p | 25677225 |
| hsa-miR-374b   | 25677225 |
| hsa-miR-155    | 25677225 |
| hsa-miR-20b    | 25677225 |
| hsa-miR-126a   | 25677225 |
| hsa-miR-342-3p | 25677225 |
| hsa-miR-107    | 25677225 |
| hsa-miR-29a    | 25677225 |
| hsa-miR-34a    | 25677225 |
| hsa-miR-142-3p | 25677225 |
| hsa-miR-106b   | 25677225 |
| hsa-miR-146a   | 18633110 |
| hsa-miR-107    | 19689793 |
| hsa-miR-24-1   | 20651284 |
| hsa-miR-24-2   | 20651284 |
| hsa-miR-320a   | 20651284 |
| hsa-miR-146a   | 21249428 |
| hsa-miR-143    | 21441927 |
| hsa-miR-103a-1 | 21654750 |
| hsa-miR-103a-2 | 21654750 |
| hsa-miR-144    | 21829658 |
| hsa-miR-483    | 22223106 |
| hsa-miR-107    | 22645244 |
| hsa-miR-126    | 23144172 |
| hsa-miR-99a    | 23762265 |
| has-miR-26a    | 25961460 |

## REFERENCES

- Park YY, Kim SB, Han HD, Sohn BH, Kim JH, Liang J, Lu Y, Rodriguez-Aguayo C, Lopez-Berestein G, Mills GB, Sood AK, Lee JS. Tat-activating regulatory DNA-binding protein regulates glycolysis in hepatocellular carcinoma by regulating the platelet isoform of phosphofructokinase through microRNA 520. *Hepatology*. 2013; 58:182–191.
- Jackson RC, Lui MS, Boritzki TJ, Morris HP, Weber G. Purine and pyrimidine nucleotide patterns of normal, differentiating, and regenerating liver and of hepatomas in rats. *Cancer research*. 1980; 40:1286–1291.
- Meng F, Henson R, Wehbe-Janek H, Ghoshal K, Jacob ST, Patel T. MicroRNA-21 regulates expression of the PTEN tumor suppressor gene in human hepatocellular cancer. *Gastroenterology*. 2007; 133:647–658.
- Garofalo M, Di Leva G, Romano G, Nuovo G, Suh SS, Ngankee A, Taccioli C, Pichiorri F, Alder H, Secchiero P, Gasparini P, Gonelli A, Costinean S, Acunzo M, Condorelli G, Croce CM. miR-221&222 regulate TRAIL resistance and enhance tumorigenicity through PTEN and TIMP3 downregulation. *Cancer cell*. 2009; 16:498–509.
- Dolce V, Cappello AR, Lappano R, Maggiolini M. Glycerophospholipid synthesis as a novel drug target against cancer. *Current molecular pharmacology*. 2011; 4:167–175.
- Ho JC, Cheung ST, Leung KL, Ng IO, Fan ST. Decreased expression of cytochrome P450 2E1 is associated with poor prognosis of hepatocellular carcinoma. *International journal of cancer Journal international du cancer*. 2004; 111:494–500.
- Su H, Yang JR, Xu T, Huang J, Xu L, Yuan Y, Zhuang SM. MicroRNA-101, down-regulated in hepatocellular carcinoma, promotes apoptosis and suppresses tumorigenicity. *Cancer research*. 2009; 69:1135–1142.
- Leng J, Han C, Demetris AJ, Michalopoulos GK, Wu T. Cyclooxygenase-2 promotes hepatocellular carcinoma cell growth through Akt activation: evidence for Akt inhibition in celecoxib-induced apoptosis. *Hepatology*. 2003; 38:756–768.
- Zhou L, Wang Q, Yin P, Xing W, Wu Z, Chen S, Lu X, Zhang Y, Lin X, Xu G. Serum metabolomics reveals the deregulation of fatty acids metabolism in hepatocellular carcinoma and chronic liver diseases. *Analytical and bioanalytical chemistry*. 2012; 403:203–213.
- Liang L, Wong CM, Ying Q, Fan DN, Huang S, Ding J, Yao J, Yan M, Li J, Yao M, Ng IO, He X. MicroRNA-125b suppressed human liver cancer cell proliferation and metastasis by directly targeting oncogene LIN28B2. *Hepatology*. 2010; 52:1731–1740.
- Yuan JM, Gao YT, Ong CN, Ross RK, Yu MC. Prediagnostic level of serum retinol in relation to reduced risk of hepatocellular carcinoma. *Journal of the National Cancer Institute*. 2006; 98:482–490.
- Newsome PN, Beldon I, Moussa Y, Delahooke TE, Pouloupoulos G, Hayes PC, Plevris JN. Low serum retinol levels are associated with hepatocellular carcinoma in patients with chronic liver disease. *Alimentary pharmacology & therapeutics*. 2000; 14:1295–1301.
- Ogretmen B, Hannun YA. Biologically active sphingolipids in cancer pathogenesis and treatment. *Nature reviews Cancer*. 2004; 4:604–616.
- Silins I, Nordstrand M, Hogberg J, Stenius U. Sphingolipids suppress preneoplastic rat hepatocytes *in vitro* and *in vivo*. *Carcinogenesis*. 2003; 24:1077–1083.
- Kandyba AG, Kobliakov VA, Somova OG, Dyatlovitskaya EV. Change in contents of biologically active sphingolipids modulating cell growth and survival in hepatoma 27 compared to rat liver. *Biochemistry Biokhimiia*. 2004; 69:497–500.
- Kathagen A, Schulte A, Balcke G, Phillips HS, Martens T, Matschke J, Gunther HS, Soriano R, Modrusan Z, Sandmann T, Kuhl C, Tissier A, Holz M, Krawinkel LA, Glatzel M, Westphal M, et al. Hypoxia and oxygenation induce a metabolic switch between pentose phosphate pathway and glycolysis in glioma stem-like cells. *Acta neuropathologica*. 2013; 126:763–780.
- Lei S, Zavala-Flores L, Garcia-Garcia A, Nandakumar R, Huang Y, Madayiputhiya N, Stanton RC, Dodds ED, Powers R, Franco R. Alterations in energy/redox metabolism induced by mitochondrial and environmental toxins: a specific role for glucose-6-phosphate-dehydrogenase and the pentose phosphate pathway in paraquat toxicity. *ACS chemical biology*. 2014; 9:2032–2048.
- Granata OM, Carruba G, Montalto G, Miele M, Bellavia V, Modica G, Blomquist CH, Castagnetta LA. Altered androgen metabolism eventually leads hepatocellular carcinoma to an impaired hormone responsiveness. *Molecular and cellular endocrinology*. 2002; 193:51–58.
- De Maria N, Manno M, Villa E. Sex hormones and liver cancer. *Molecular and cellular endocrinology*. 2002; 193:59–63.
- Christofk HR, Vander Heiden MG, Harris MH, Ramanathan A, Gerszten RE, Wei R, Fleming MD, Schreiber SL, Cantley LC. The M2 splice isoform of pyruvate kinase is important for cancer metabolism and tumour growth. *Nature*. 2008; 452:230–233.
- Vander Heiden MG. Targeting cancer metabolism: a therapeutic window opens. *Nature reviews Drug discovery*. 2011; 10:671–684.
- Fu L, Dong SS, Xie YW, Tai LS, Chen L, Kong KL, Man K, Xie D, Li Y, Cheng Y, Tao Q, Guan XY. Down-regulation of tyrosine aminotransferase at a frequently deleted region 16q22 contributes to the pathogenesis of hepatocellular carcinoma. *Hepatology*. 2010; 51:1624–1634.
- Huang ZZ, Chen C, Zeng Z, Yang H, Oh J, Chen L, Lu SC. Mechanism and significance of increased glutathione level in human hepatocellular carcinoma and liver regeneration.

- FASEB journal : official publication of the Federation of American Societies for Experimental Biology. 2001; 15:19–21.
24. Zou Y, Song Y, Yang W, Meng F, Liu H, Zhong Z. Galactose-installed photo-crosslinked pH-sensitive degradable micelles for active targeting chemotherapy of hepatocellular carcinoma in mice. *Journal of controlled release: official journal of the Controlled Release Society*. 2014; 193:154–161.
  25. Sorensen M, Frisch K, Bender D, Keiding S. The potential use of 2-[(1)(8)F]fluoro-2-deoxy-D-galactose as a PET/CT tracer for detection of hepatocellular carcinoma. *European journal of nuclear medicine and molecular imaging*. 2011; 38:1723–1731.
  26. Ai W, Takaishi S, Wang TC, Fleming JV. Regulation of L-histidine decarboxylase and its role in carcinogenesis. *Progress in nucleic acid research and molecular biology*. 2006; 81:231–270.
  27. Murray GI, Taylor MC, Burke MD, Melvin WT. Enhanced expression of cytochrome P450 in stomach cancer. *Br J Cancer*. 1998; 77:1040–1044.
  28. Wideroff L, Vaughan TL, Farin FM, Gammon MD, Risch H, Stanford JL, Chow WH. GST, NAT1, CYP1A1 polymorphisms and risk of esophageal and gastric adenocarcinomas. *Cancer Detect Prev*. 2007; 31:233–236.
  29. Durak ZE, Buber S, Kocaoglu EH, Ozturk B. Static magnetic field inhibits 5' nucleotidase activity in cancerous and non-cancerous human gastric tissues. *Electromagn Biol Med*. 2014:1–5.
  30. Hu KW, Chen FH, Ge JF, Cao LY, Li H. Retinoid receptors in gastric cancer: expression and influence on prognosis. *Asian Pac J Cancer Prev*. 2012; 13:1809–1817.
  31. Cho LY, Yang JJ, Ko KP, Ma SH, Shin A, Choi BY, Han DS, Song KS, Kim YS, Chang SH, Shin HR, Kang D, Yoo KY, Park SK. Genetic susceptibility factors on genes involved in the steroid hormone biosynthesis pathway and progesterone receptor for gastric cancer risk. *PLoS One*. 2012; 7(10):e47603.
  32. Kominea A, Konstantinopoulos PA, Kapranos N, Vandroos G, Gkermepesi M, Andricopoulos P, Artelaris S, Savva S, Varakis I, Sotiropoulou-Bonikou G, Papavassiliou AG. Androgen receptor (AR) expression is an independent unfavorable prognostic factor in gastric cancer. *J Cancer Res Clin Oncol*. 2004; 130:253–258.
  33. Benjamin DI, Louie SM, Mulvihill MM, Kohnz RA, Li DS, Chan LG, Sorrentino A, Bandyopadhyay S, Cozzo A, Ohiri A, Goga A, Ng SW, Nomura DK. Inositol phosphate recycling regulates glycolytic and lipid metabolism that drives cancer aggressiveness. *ACS Chem Biol*. 2014; 9:1340–1350.
  34. Liu X, Wang X, Zhang J, Lam EK, Shin VY, Cheng AS, Yu J, Chan FK, Sung JJ, Jin HC. Warburg effect revisited: an epigenetic link between glycolysis and gastric carcinogenesis. *Oncogene*. 2010; 29:442–450.
  35. Maehara Y, Kusumoto T, Sakaguchi Y, Kusumoto H, Kido Y, Anai H, Sugimachi K. Pyrimidine nucleotide synthesis is more extensive in poorly differentiated than in well-differentiated human gastric carcinoma. *Cancer*. 1989; 63:96–101.
  36. Meng X, Liu Y, Liu B. Glutathione S-transferase M1 null genotype meta-analysis on gastric cancer risk. *Diagn Pathol*. 2014; 9:122.
  37. Cai L, Yu SZ, Zhang ZF. Glutathione S-transferases M1, T1 genotypes and the risk of gastric cancer: a case-control study. *World J Gastroenterol*. 2001; 7:506–509.
  38. Fan XM, Jiang XH, Gu Q, Ching YP, He H, Xia HH, Lin MC, Chan AO, Yuen MF, Kung HF, Wong BC. Inhibition of Akt/PKB by a COX-2 inhibitor induces apoptosis in gastric cancer cells. *Digestion*. 2006; 73(2–3):75–83.
  39. Wang Z, Chen JQ, Liu JL. COX-2 Inhibitors and Gastric Cancer. *Gastroenterol Res Pract*. 2014; 2014:132320.
  40. Kwon OH, Kang TW, Kim JH, Kim M, Noh SM, Song KS, Yoo HS, Kim WH, Xie Z, Pocalyko D, Kim SY, Kim YS. Pyruvate kinase M2 promotes the growth of gastric cancer cells via regulation of Bcl-xL expression at transcriptional level. *Biochem Biophys Res Commun*. 2012; 423:38–44.
  41. Yoo BC, Ku JL, Hong SH, Shin YK, Park SY, Kim HK, Park JG. Decreased pyruvate kinase M2 activity linked to cisplatin resistance in human gastric carcinoma cell lines. *International journal of cancer Journal international du cancer*. 2004; 108:532–539.
  42. Lu Y, Zhang X, Zhang H, Lan J, Huang G, Varin E, Lincet H, Poulain L, Icard P. Citrate induces apoptotic cell death: a promising way to treat gastric carcinoma? *Anticancer Res*. 2011; 31:797–805.
  43. Kosik J, Gil J, Szmigielski S, Beuth J, Pulverer G. Prevention of hepatic metastases by liver lectin blocking with D-galactose in stomach cancer patients. A prospectively randomized clinical trial. *Anticancer Res*. 1997; 17:1411–1415.
  44. Li PH, Wu JX, Zheng JN, Pei DS. A sphingosine kinase-1 inhibitor, SKI-II, induces growth inhibition and apoptosis in human gastric cancer cells. *Asian Pac J Cancer Prev*. 2014; 15:10381–10385.
  45. Li W, Yu CP, Xia JT, Zhang L, Weng GX, Zheng HQ, Kong QL, Hu LJ, Zeng MS, Zeng YX, Li M, Li J, Song LB. Sphingosine kinase 1 is associated with gastric cancer progression and poor survival of patients. *Clin Cancer Res*. 2009; 15:1393–1399.
  46. Xia JF, Liang QL, Hu P, Wang YM, Li P, Luo GA. Correlations of six related purine metabolites and diabetic nephropathy in Chinese type 2 diabetic patients. *Clin Biochem*. 2009; 42:215–220.
  47. Xia J, Wang Z, Zhang F. Association between Related Purine Metabolites and Diabetic Retinopathy in Type 2 Diabetic Patients. *Int J Endocrinol*. 2014; 2014:651050.



48. Gastaldelli A, Toschi E, Pettiti M, Frascerra S, Quinones-Galvan A, Sironi AM, Natali A, Ferrannini E. Effect of physiological hyperinsulinemia on gluconeogenesis in non-diabetic subjects and in type 2 diabetic patients. *Diabetes*. 2001; 50:1807–1812.
49. Lin HV, Accili D. Hormonal regulation of hepatic glucose production in health and disease. *Cell Metab*. 2011; 14:9–19
50. Xia JF, Hu P, Liang QL, Zou TT, Wang YM, Luo GA. Correlations of creatine and six related pyrimidine metabolites and diabetic nephropathy in Chinese type 2 diabetic patients. *Clin Biochem*. 2010; 43:957–962.
51. Gupte RS, Floyd BC, Kozicky M, George S, Ungvari ZI, Neito V, Wolin MS, Gupte SA. Synergistic activation of glucose-6-phosphate dehydrogenase and NAD(P)H oxidase by Src kinase elevates superoxide in type 2 diabetic, Zucker fa/fa, rat liver. *Free Radic Biol Med*. 2009; 47:219–228.
52. Nagle CA, An J, Shiota M, Torres TP, Cline GW, Liu ZX, Wang S, Catlin RL, Shulman GI, Newgard CB, Coleman RA. Hepatic overexpression of glycerol-sn-3-phosphate acyltransferase 1 in rats causes insulin resistance. *J Biol Chem*. 2007; 282:14807–14815.
53. Cao G, Konrad RJ, Li SD, Hammond C. Glycerolipid acyltransferases in triglyceride metabolism and energy homeostasis-potential as drug targets. *Endocr Metab Immune Disord Drug Targets*. 2012; 12:197–206.
54. Das UN, Rao AA. Gene expression profile in obesity and type 2 diabetes mellitus. *Lipids Health Dis*. 2007; 6:35.
55. Kim YK, Lee GS, Jung EM, Hyun SH, Hwang WS, Jeung EB. Generation of fibroblasts overexpressing liver-specific PEPCK in a miniature pig model of human type 2 diabetes mellitus. *Mol Med Rep*. 2012; 6:45–50.
56. Jeong YW, Lee GS, Kim JJ, Park SW, Ko KH, Kang M, Kim YK, Jung EM, Hyun SH, Shin T, Jeung EB, Hwang WS. Establishment of a canine model of human type 2 diabetes mellitus by overexpressing phosphoenolpyruvate carboxykinase. *Int J Mol Med*. 2012; 30:321–329.
